# Supplementary material
Source: PubMed Central journal article supplement (PMC4423829)
Supplement: NIHMS642744-supplement-2.pdf [file NIHMS642744-supplement-2.pdf]

## Supplementary Observations

### *NOTCH1 decoy variants have unique effects on murine retinal angiogenesis*

- No significant difference was observed in neonatal NG2-positive retinal pericyte coverage (data not shown).

### *Notch1 decoys inhibit tumor growth and angiogenesis by unique JAG- versus DLL-dependent mechanisms*

- N1 decoys did not affect tumor cell proliferation or apoptosis in any of the tumor lines grown in monolayer cultures (Supplementary Fig. S6C, S6D, and data not shown).
- The ability of N1<sub>1-24</sub> decoy to perturb Mm5MT-FGF4 and KP1-VEGF tumor growth was similar to that observed for the full-length Notch1 decoy (N1<sub>1-36</sub>) (data not shown).
- Reduced vascular smooth muscle  $\alpha$ SMA immunostaining on large vessels was observed on the mural cells of N1<sub>10-24</sub> and N1<sub>1-24</sub> decoy-treated B16-F10 tumors (data not shown), whereas KP1-VEGF and LLC control tumors have poor vascular mural cell coverage to begin with and therefore were not assessed (data not shown).

### *JAG and DLL differentially regulate sVEGFR-1/soluble Flt1*

- JAG1 was knocked down in HUVECs using an shRNA containing lentivirus (J1KD), which consistently reduced transcripts by 50% (data not shown).
